# Supplementary material for: School and Work Absences After Critical Care Hospitalization for Pediatric Acute Respiratory Failure: A Secondary Analysis of a Cluster Randomized Trial
Source: PubMed Central journal article supplement (PMC8703244; doi:10.1001/jamanetworkopen.2021.40732), 2021-12-23
Supplement: jamanetwopen-e2140732-s001.pdf [file jamanetwopen-e2140732-s001.pdf]

## Supplementary Online Content

Carlton EF, Donnelly JP, Prescott HC, et al; RESTORE Study Investigators. School and work absences after critical care hospitalization for pediatric acute respiratory failure: a secondary analysis of a cluster randomized trial. *JAMA Netw Open*. 2021;4(12):e2140732. doi:10.1001/jamanetworkopen.2021.40732

**eMethods 1.** Follow-up Survey Questions

**eMethods 2.** Measurements

**eTable 1.** Multivariable Models of Risk Factors to Predict Rate and Duration of School Absence After Hospital Discharge

**eTable 2.** School and Work Absence According to RESTORE Treatment Group

**eTable 3.** Patient, Family, and Hospitalization Characteristics Across Duration of School Absence Category During and After Hospitalization (n = 454)

**eTable 4.** Parent, Family, and Hospitalization Characteristics Across Quartiles of Duration of Postdischarge Work Absence Category in Primary Caregivers (n = 506)

**eTable 5.** Patient, Family, and Hospitalization Characteristics Across Quartiles of Duration of Postdischarge Work Absence Category Among Secondary Caregivers (n = 614)

**eTable 6.** Postdischarge School Absenteeism by Age Group

**eTable 7.** Post-Discharge Employment and Work Absenteeism by Age Group

This supplementary material has been provided by the authors to give readers additional information about their work.

## **eMethods 1. Follow-Up Survey Questions**

### **Child**

Has your child missed any days of daycare, pre-school, or school since being ADMITTED to the hospital roughly 6 months ago? (Include Hospital Stay)

- Yes
- No
- Don't Know
- Refused

How many days of daycare, pre-school or school has your child missed (including hospital admission)?

\_\_\_\_\_

### **Primary and Secondary Caregivers:**

While your child was in the hospital, how many days did you have to miss work to be with him/her? [starting with the day of hospital admission until child ultimately discharged home, and including time at a transfer hospital or other medical facility, if applicable]

- Not Applicable –Parent does not work
- Number\_\_\_\_
- Don't Know
- Refused

While your child was in the hospital, how many days did another person who had been planning to work have to miss work to be with him/her? [starting with the day of hospital admission until child ultimately discharged home, and including time at a transfer hospital or other medical facility, if applicable]

- Not Applicable –Parent does not work
- Number\_\_\_\_
- Don't Know
- Refused

Since your child was discharged from the hospital, how many days have you had to stay home from work to be with him/her when you been planning to work?

- Not Applicable –Parent does not work
- Number\_\_\_\_
- Don't Know
- Refused

Since your child was discharged from the hospital, how many days has another person who had been planning to work had to stay home from work to be with him/her?

- Not Applicable –Parent does not work
- Number\_\_\_\_
- Don't Know
- Refused

### **Siblings**

Does (child's name) have any Siblings?

- Yes
- No

Refused

Have (child's name) siblings missed any days of daycare, pre-school or school due to his/her brother/sister being ill and hospitalized) roughly 6 months ago? (Including days during patient's hospitalization and any days thereafter)

Yes

No

Not Sure

N/A siblings not enrolled in school/not school age

Refused

How many days of daycare, pre-school or school has his/her brothers/sisters had to miss due to [child's name] illness and hospitalization?

Age

Days During Hospitalization

Days After Hospitalization

\_\_\_\_\_

\_\_\_\_\_

\_\_\_\_\_

## **eMethods 2. Measurements**

We sought to measure the rate and duration of school absence after hospital discharge. As summer hospitalizations are less likely to result in school absenteeism, we measured the school absence rate only among patients who were discharged during the school year (September-June). We estimated the number of school days missed following discharge by subtracting the length of hospitalization from the total number of school days reported as missed from hospital admission through 6 months post-discharge. We accounted for the 5-day school week (compared to the 7-day calendar week) by multiplying the hospital length of stay by  $5/7$  (or 0.71). Thus, a patient was considered to have missed school following discharge if the number of school days missed exceeded the total hospital length of stay.

Prior comorbidity status was determined as part of the parent RESTORE study and included prematurity, asthma, seizure disorder, neurologic/neuromuscular disorder, cancer, or known chromosomal abnormality. Prematurity was defined as <36 weeks postmenstrual age. Asthma identified by prescription of bronchodilators or steroids. Cancer included current or prior malignancy diagnosis. Seizure disorders were identified by prescription anticonvulsant medications. Neuromuscular/neurologic disorders included those which put a patient at risk for aspiration.

| <b>eTable 1. Multivariable Models of Risk Factors to Predict Rate and Duration of School Absence After Hospital Discharge</b>                                                                                |                                        |                |
|--------------------------------------------------------------------------------------------------------------------------------------------------------------------------------------------------------------|----------------------------------------|----------------|
| <b>Rate of School Absence (n = 392)</b>                                                                                                                                                                      | <b>Odds Ratio (95% CI)<sup>a</sup></b> | <b>P Value</b> |
| Age group                                                                                                                                                                                                    |                                        | 0.001          |
| 0-4 years (reference category)                                                                                                                                                                               | 1.0                                    |                |
| 5-8 years                                                                                                                                                                                                    | 3.2 (1.7-6.2)                          |                |
| 9-12 years                                                                                                                                                                                                   | 2.6 (1.2-5.4)                          |                |
| 13-18 years                                                                                                                                                                                                  | 2.4 (1.2-4.8)                          |                |
| Minority race/ethnicity                                                                                                                                                                                      | 0.8 (0.5-1.5)                          | 0.53           |
| Functional impairment (POPC >1) at baseline <sup>b</sup>                                                                                                                                                     | 1.5 (0.8-2.8)                          | 0.16           |
| Pre-existing comorbidity                                                                                                                                                                                     | 1.9 (1.1-3.3)                          | 0.03           |
| Primary diagnosis category                                                                                                                                                                                   |                                        | 0.39           |
| Pneumonia (reference category)                                                                                                                                                                               | 1.0                                    |                |
| Bronchiolitis or asthma                                                                                                                                                                                      | 0.8 (0.5-1.5)                          |                |
| Acute respiratory failure related to sepsis                                                                                                                                                                  | 1.3 (0.6-2.7)                          |                |
| Other                                                                                                                                                                                                        | 1.9 (0.8-4.6)                          |                |
| Primary caregiver main daily activities                                                                                                                                                                      |                                        | 0.001          |
| Working full-time (reference category)                                                                                                                                                                       | 1.0                                    |                |
| Keeping house/raising children                                                                                                                                                                               | 0.3 (0.2-0.6)                          |                |
| Working part-time                                                                                                                                                                                            | 0.8 (0.4-1.6)                          |                |
| Other (student, retired, disabled)                                                                                                                                                                           | 0.4 (0.2-1.0)                          |                |
| Number of Siblings                                                                                                                                                                                           | 1.0 (0.8-1.2)                          | 0.77           |
| Secondary Caregiver                                                                                                                                                                                          | 0.7 (0.4-1.3)                          | 0.26           |
| Abbreviations: CI, confidence interval; POPC, Pediatric Overall Performance Category.<br>The largest group within each variable was chosen as the reference category.                                        |                                        |                |
| <sup>a</sup> Odds ratio >1 indicates higher odds of missed school post-discharge. Odds ratios were calculated using logistic regression.                                                                     |                                        |                |
| <sup>b</sup> Disability was determined using the Pediatric Overall Performance Category. A score of 1 indicates a good functional status, while a score of 2 or greater represents at least mild disability. |                                        |                |

| <b>eTable 2. School and Work Absence According to RESTORE Treatment Group</b>                                                    |                          |                   |                |
|----------------------------------------------------------------------------------------------------------------------------------|--------------------------|-------------------|----------------|
| No./total (%)                                                                                                                    | <b>Sedation Protocol</b> | <b>Usual Care</b> | <b>P Value</b> |
| <b>Child</b>                                                                                                                     |                          |                   |                |
| Any missed days after hospitalization,                                                                                           | 136/194 (70.1)           | 143/205 (69.7)    | 0.94           |
| No. of missed days, median (IQR)                                                                                                 | 8.9 (0-26.4)             | 9.3 (0-27.9)      | 0.87           |
| <b>Primary Caregiver</b>                                                                                                         |                          |                   |                |
| Any missed days during hospitalization                                                                                           | 225/269 (83.6)           | 201/237 (84.8)    | 0.72           |
| No. of missed days during hospitalization, median (IQR)                                                                          | 10 (5-20)                | 10 (4-20)         | 0.35           |
| Any missed days after hospitalization                                                                                            | 142/269 (52.8)           | 135/237 (57.0)    | 0.35           |
| No. of missed days after hospitalization, median (IQR)                                                                           | 2(0-10)                  | 2(0-10)           | 0.61           |
| <b>Secondary Caregiver</b>                                                                                                       |                          |                   |                |
| Any missed days during hospitalization                                                                                           | 269/344 (78.2)           | 215/270 (79.6)    | 0.67           |
| No. of missed days during hospitalization, median (IQR)                                                                          | 5 (2-10)                 | 6 (3-10)          | 0.76           |
| Any missed days after hospitalization                                                                                            | 107/344 (31.1)           | 86/270 (31.9)     | 0.84           |
| No. of missed days after hospitalization, median (IQR)                                                                           | 0 (0-2)                  | 0 (0-2)           | 0.81           |
| Abbreviations: IQR, interquartile range. Missed days among children and caregivers are missed school or work days, respectively. |                          |                   |                |

**eTable 3. Patient, Family, and Hospitalization Characteristics Across Duration of School Absence Category During and After Hospitalization (n = 454)**

| No./total (%)                                                  | No Absence (n = 82)    | Short Absence (n = 129) | Medium Absence (n = 125) | Long Absence (n = 118) | P Value <sup>a</sup> |
|----------------------------------------------------------------|------------------------|-------------------------|--------------------------|------------------------|----------------------|
| Duration of school absence, median (IQR), d                    | 0 (0-0)                | 10 (5-12)               | 25 (20-30)               | 88.5 (60-112)          | <0.001               |
| Range                                                          | 0-0                    | 1-15                    | 16-40                    | 41-300                 |                      |
| <b>Patient Characteristics</b>                                 |                        |                         |                          |                        |                      |
| Age at PICU admission, median (IQR), y                         | 2.5 (0.26-10.5)        | 7.1 (3.6-11.1)          | 5.8 (3.4-12.1)           | 9.1 (5.9-12.5)         | <0.001               |
| Female                                                         | 35 (42.7)              | 58 (45.0)               | 57 (45.6)                | 57 (48.3)              | 0.43                 |
| Non-Hispanic white,                                            | 43/82 (52.4)           | 75/129 (58.1)           | 77/124 (62.1)            | 78/117 (66.7)          | 0.03                 |
| Functional impairment (POPC >1) at baseline <sup>b</sup>       | 19 (23.2)              | 32 (24.8)               | 39 (31.2)                | 55 (46.6)              | <0.001               |
| <b>Pre-existing comorbidity</b>                                |                        |                         |                          |                        |                      |
| Asthma                                                         | 8 (9.8)                | 40 (31.0)               | 30 (24.0)                | 13 (11.0)              | 0.38                 |
| Cancer                                                         | 2 (2.4)                | 4 (3.1)                 | 5 (4.0)                  | 22 (18.6)              | <0.001               |
| Chromosomal abnormality                                        | 2 (2.4)                | 2 (1.5)                 | 8 (6.4)                  | 11 (9.3)               | 0.005                |
| Prematurity                                                    | 8 (9.8)                | 11 (8.5)                | 11 (8.8)                 | 11 (9.3)               | 0.98                 |
| Neurologic/neuromuscular disorder                              | 6 (7.3)                | 11 (8.5)                | 11 (8.8)                 | 22 (18.6)              | 0.01                 |
| Seizure disorder                                               | 5 (6.1)                | 14 (10.9)               | 18 (14.4)                | 21 (17.8)              | 0.01                 |
| No known comorbidity                                           | 54 (65.9)              | 62 (48.1)               | 62 (49.6)                | 52 (44.1)              | 0.009                |
| <b>Family Characteristics</b>                                  |                        |                         |                          |                        |                      |
| <b>Primary caregiver education</b>                             |                        |                         |                          |                        |                      |
| Some high school                                               | 2 (3.2)                | 9 (10.0)                | 11 (12.1)                | 8 (10.0)               | 0.76                 |
| High school graduate                                           | 14 (22.2)              | 20 (22.2)               | 23 (25.3)                | 15 (18.8)              |                      |
| Some college or technical school                               | 26 (41.3)              | 23 (25.6)               | 21 (23.1)                | 27 (33.8)              |                      |
| College graduate/postgraduate                                  | 21 (33.3)              | 38 (42.2)               | 36 (39.6)                | 30 (37.5)              |                      |
| Missing, No.                                                   | 19                     | 39                      | 24                       | 38                     |                      |
| <b>Primary caregiver main daily activities</b>                 |                        |                         |                          |                        |                      |
| Working full-time                                              | 33 (40.7)              | 62 (48.4)               | 67 (54.0)                | 54 (46.6)              | 0.39                 |
| Working part-time                                              | 13 (16.1)              | 19 (14.8)               | 25 (20.2)                | 17 (14.7)              |                      |
| Keeping house/raising children                                 | 25 (30.9)              | 35 (27.3)               | 24 (19.24)               | 34 (29.3)              |                      |
| Other (student, retired, disabled)                             | 10 (12.4)              | 12 (9.4)                | 8 (6.5)                  | 11 (9.5)               |                      |
| Missing, No.                                                   | 1                      | 1                       | 1                        | 2                      |                      |
| <b>Secondary caregiver main daily activities</b>               |                        |                         |                          |                        |                      |
| Working full-time                                              | 45 (71.4)              | 73 (76.0)               | 76 (79.2)                | 79 (84.0)              | 0.04                 |
| Working part-time                                              | 6 (9.5)                | 6 (6.3)                 | 7 (7.3)                  | 6 (6.4)                |                      |
| Keeping house/raising children                                 | 3 (4.8)                | 6 (6.3)                 | 8 (8.3)                  | 3 (3.2)                |                      |
| Other (student, retired, disabled)                             | 9 (14.3)               | 11 (11.5)               | 5 (5.2)                  | 6 (6.4)                |                      |
| Missing, No.                                                   | 19                     | 33                      | 29                       | 24                     |                      |
| Median household income of zip code of residence, median (IQR) | 54,059 (44,922-73,200) | 54,581 (43,147-78,356)  | 61,250 (46,519-77,143)   | 60,257 (45,810-80,833) | 0.06                 |
| <b>Income category of zip code of residence</b>                |                        |                         |                          |                        |                      |

|                                                                                                                                                                                                                                                                                                                                                                                                                                    |                |                |                 |                 |        |
|------------------------------------------------------------------------------------------------------------------------------------------------------------------------------------------------------------------------------------------------------------------------------------------------------------------------------------------------------------------------------------------------------------------------------------|----------------|----------------|-----------------|-----------------|--------|
| <\$40,000                                                                                                                                                                                                                                                                                                                                                                                                                          | 18 (22.0)      | 23 (17.8)      | 17 (13.6)       | 14 (11.9)       | 0.08   |
| \$40,000 - \$79,999                                                                                                                                                                                                                                                                                                                                                                                                                | 48 (58.4)      | 74 (57.4)      | 77 (61.6)       | 74 (62.7)       |        |
| ≥\$80,000                                                                                                                                                                                                                                                                                                                                                                                                                          | 16 (19.5)      | 32 (24.8)      | 31 (24.8)       | 30 (25.4)       |        |
| Duration of missed work during hospitalization of primary caregiver, median (IQR), d                                                                                                                                                                                                                                                                                                                                               | 7 (5-10)       | 7 (5-10)       | 15 (9-20)       | 23 (13-35)      | <0.001 |
| Duration of missed work after hospitalization of primary caregiver, median (IQR), d                                                                                                                                                                                                                                                                                                                                                | 5 (3-7)        | 5 (2-10)       | 10 (4-15)       | 20 (7-40)       | <0.001 |
| <b>Hospitalization Characteristics</b>                                                                                                                                                                                                                                                                                                                                                                                             |                |                |                 |                 |        |
| PRISM III-12 score, median (IQR) <sup>c</sup>                                                                                                                                                                                                                                                                                                                                                                                      | 7.5 (3-11)     | 8 (5-13)       | 7 (3-14)        | 10 (5-15)       | 0.04   |
| Primary diagnosis category                                                                                                                                                                                                                                                                                                                                                                                                         |                |                |                 |                 |        |
| Bronchiolitis or asthma                                                                                                                                                                                                                                                                                                                                                                                                            | 29 (35.4)      | 36 (27.9)      | 33 (26.4)       | 8 (6.8)         | <0.001 |
| Pneumonia or aspiration pneumonia                                                                                                                                                                                                                                                                                                                                                                                                  | 34 (41.5)      | 68 (52.7)      | 59 (47.2)       | 66 (55.9)       |        |
| Acute respiratory failure related to sepsis                                                                                                                                                                                                                                                                                                                                                                                        | 10 (12.2)      | 15 (11.6)      | 19 (15.2)       | 26 (22.0)       |        |
| Other <sup>d</sup>                                                                                                                                                                                                                                                                                                                                                                                                                 | 9 (11.0)       | 10 (7.7)       | 14 (11.2)       | 18 (15.5)       |        |
| Randomized to <i>RESTORE</i> sedation protocol                                                                                                                                                                                                                                                                                                                                                                                     | 47 (57.3)      | 60 (46.5)      | 57 (45.6)       | 56 (47.5)       | 0.24   |
| PICU length of stay, median (IQR), d                                                                                                                                                                                                                                                                                                                                                                                               | 8.1 (5.3-14.2) | 7.0 (4.6-10.1) | 10.9 (7.2-16.4) | 15.2 (7.9-25.1) | <0.001 |
| Functional impairment (POPC >1) at discharge <sup>b</sup>                                                                                                                                                                                                                                                                                                                                                                          | 26 (31.7)      | 42 (32.6)      | 58 (46.4)       | 69 (58.5)       | <0.001 |
| <b>Post-hospitalization Outcomes</b>                                                                                                                                                                                                                                                                                                                                                                                               |                |                |                 |                 |        |
| Emergency department use in the 6 months following discharge                                                                                                                                                                                                                                                                                                                                                                       | 26 (31.7)      | 42 (32.6)      | 36 (28.8)       | 49 (41.5)       | 0.21   |
| Hospital readmission in the 6 months following discharge                                                                                                                                                                                                                                                                                                                                                                           | 16 (19.5)      | 23 (17.8)      | 34 (27.2)       | 54 (45.8)       | <0.001 |
| Abbreviations: IQR, interquartile range; PICU, pediatric intensive care unit; POPC, Pediatric Overall Performance Category; PRISM III-12, Pediatric Risk of Mortality III score from first 12 hours in the PICU.                                                                                                                                                                                                                   |                |                |                 |                 |        |
| <sup>a</sup> <i>P</i> values for comparison across groups were calculated using the chi-square test for trend or the non-parametric test for trend (Jonckheere-Terpstra test) for categorical and continuous variables, respectively. Tertiles for school days missed (short, medium, long absence) were created using whole number of days missed and, as such, it is possible to have unequal numbers of patients in each group. |                |                |                 |                 |        |
| <sup>b</sup> Disability was determined using the Pediatric Overall Performance Category. A score of 1 indicates a good functional status, while a score of 2 or greater represents at least mild disability.                                                                                                                                                                                                                       |                |                |                 |                 |        |
| <sup>c</sup> PRISM III-12 score utilizes physiologic and laboratory variables from the first 12 hours of PICU admission to calculate the overall risk of mortality. A higher score represents a higher risk of mortality.                                                                                                                                                                                                          |                |                |                 |                 |        |
| <sup>d</sup> Other primary diagnoses include pulmonary edema or hemorrhage, pulmonary hypertension, laryngotracheobronchitis, thoracic trauma, pneumothorax, acute chest syndrome, pertussis, exacerbation of lung disease (cystic fibrosis or bronchopulmonary dysplasia), acute respiratory failure related to blood transfusions, acute respiratory failure after bone marrow transplantation, and other.                       |                |                |                 |                 |        |



**eTable 4. Parent, Family, and Hospitalization Characteristics Across Quartiles of Duration of Postdischarge Work Absence Category in Primary Caregivers (n = 506)**

| No./total (%)                                                  | No Absence (n = 229)   | Short Absence (n = 123) | Medium Absence (n = 70) | Long Absence (n = 84)  | P Value <sup>a</sup> |
|----------------------------------------------------------------|------------------------|-------------------------|-------------------------|------------------------|----------------------|
| Duration of school absence, median (IQR), d                    | 0 (0-0)                | 3 (2-5)                 | 10 (8-10)               | 40 (20-83)             | <0.001               |
| Range                                                          | 0-0                    | 1-5                     | 6-15                    | 16-283                 |                      |
| <b>Patient Characteristics</b>                                 |                        |                         |                         |                        |                      |
| Age at PICU admission, median (IQR), y                         | 2.0 (0.3-7.7)          | 3.1 (0.8-7.9)           | 4.2 (1.0-11.0)          | 4.9 (0.7-9.5)          | 0.002                |
| Female                                                         | 112 (48.9)             | 57 (46.3)               | 27 (38.6)               | 36 (42.9)              | 0.17                 |
| Non-Hispanic white,                                            | 127 (55.5)             | 77 (62.6)               | 41 (59.4)               | 56 (68.3)              | 0.06                 |
| Functional impairment (POPC >1) at baseline <sup>b</sup>       | 35 (15.3)              | 34 (27.6)               | 13 (18.6)               | 32 (38.1)              | <0.001               |
| <b>Pre-existing comorbidity</b>                                |                        |                         |                         |                        |                      |
| Asthma                                                         | 26 (11.4)              | 24 (19.5)               | 13 (18.6)               | 8 (9.5)                | 0.84                 |
| Cancer                                                         | 11 (4.8)               | 4 (3.2)                 | 4 (5.7)                 | 13 (15.5)              | 0.003                |
| Chromosomal abnormality                                        | 3 (1.3)                | 4 (3.3)                 | 3 (4.3)                 | 7 (8.3)                | 0.003                |
| Prematurity                                                    | 19 (8.3)               | 21 (17.1)               | 10 (14.3)               | 9 (10.7)               | 0.33                 |
| Neurologic/neuromuscular disorder                              | 13 (5.7)               | 12 (9.8)                | 4 (5.7)                 | 11 (13.1)              | 0.07                 |
| Seizure disorder                                               | 19 (8.3)               | 9 (7.3)                 | 4 (5.7)                 | 8 (9.5)                | 0.97                 |
| No known comorbidity                                           | 156 (68.1)             | 68 (55.3)               | 42 (60.0)               | 41 (48.8)              | 0.002                |
| <b>Family Characteristics</b>                                  |                        |                         |                         |                        |                      |
| <b>Primary caregiver education</b>                             |                        |                         |                         |                        |                      |
| Some high school                                               | 14 (8.2)               | 5 (5.5)                 | 5 (9.6)                 | 3 (5.3)                | 0.52                 |
| High school graduate                                           | 38 (22.2)              | 17 (18.7)               | 9 (17.3)                | 15 (26.3)              |                      |
| Some college or technical school                               | 59 (34.5)              | 33 (36.3)               | 13 (25.0)               | 18 (31.6)              |                      |
| College graduate/postgraduate                                  | 60 (35.1)              | 36 (39.6)               | 25 (48.1)               | 21 (36.8)              |                      |
| Missing, No.                                                   | 58                     | 32                      | 18                      | 27                     |                      |
| <b>Secondary caregiver main daily activities</b>               |                        |                         |                         |                        |                      |
| Working full-time                                              | 119 (59.5)             | 80 (74.1)               | 47 (88.7)               | 59 (83.1)              | <0.001               |
| Working part-time                                              | 23 (11.5)              | 8 (7.4)                 | 3 (5.7)                 | 3 (4.2)                |                      |
| Keeping house/raising children                                 | 37 (18.5)              | 16 (14.8)               | 3 (5.7)                 | 5 (7.0)                |                      |
| Other (student, retired, disabled)                             | 21 (10.5)              | 4 (3.7)                 | 0 (0.0)                 | 4 (5.6)                |                      |
| Missing, No.                                                   | 29                     | 15                      | 17                      | 13                     |                      |
| Median household income of zip code of residence, median (IQR) | 57,755 (45,381-75,286) | 55,222 (44,348-74,044)  | 53,195 (44,823-68,678)  | 61,972 (45,262-78,401) | 0.86                 |
| <b>Income category of zip code of residence</b>                |                        |                         |                         |                        |                      |
| <\$40,000                                                      | 30 (13.1)              | 23 (18.7)               | 12 (17.1)               | 11 (13.1)              | 0.82                 |
| \$40,000 - \$79,999                                            | 148 (64.6)             | 75 (61.0)               | 44 (62.9)               | 54 (64.3)              |                      |
| ≥\$80,000                                                      | 51 (22.3)              | 25 (20.3)               | 14 (20.0)               | 19 (22.6)              |                      |
| <b>Hospitalization Characteristics</b>                         |                        |                         |                         |                        |                      |
| PRISM III-12 score, median (IQR) <sup>c</sup>                  | 7 (4-12)               | 6 (3-13)                | 9 (5-13)                | 8 (4.5-14)             | 0.35                 |
| <b>Primary diagnosis category</b>                              |                        |                         |                         |                        |                      |
| Bronchiolitis or asthma                                        | 87 (38.0)              | 45 (36.6)               | 17 (24.3)               | 17 (20.2)              | 0.004                |

|                                                              |                   |                   |                    |                    |        |
|--------------------------------------------------------------|-------------------|-------------------|--------------------|--------------------|--------|
| Pneumonia or aspiration pneumonia                            | 88 (38.4)         | 65 (52.9)         | 40 (57.1)          | 40 (47.6)          |        |
| Acute respiratory failure related to sepsis                  | 34 (14.9)         | 7 (5.7)           | 7 (10.0)           | 15 (17.9)          |        |
| Other <sup>d</sup>                                           | 20 (8.7)          | 6 (4.9)           | 6 (8.6)            | 12 (14.3)          |        |
| Randomized to <i>RESTORE</i> sedation protocol               | 127 (55.5)        | 56 (45.5)         | 39 (55.7)          | 47 (56.0)          | 0.92   |
| PICU length of stay, median (IQR), d                         | 8.3<br>(5.8-12.4) | 9.2<br>(5.4-13.8) | 12.3<br>(7.1-20.1) | 12.3<br>(7.3-19.1) | <0.001 |
| Functional impairment (POPC >1) at discharge <sup>b</sup>    | 48 (21.0)         | 42 (34.2)         | 18 (25.7)          | 48 (57.1)          | <0.001 |
| <b>Post-hospitalization Outcomes</b>                         |                   |                   |                    |                    |        |
| Emergency department use in the 6 months following discharge | 69 (30.1)         | 48 (39.0)         | 34 (48.6)          | 45 (53.6)          | <0.001 |
| Hospital readmission in the 6 months following discharge     | 57 (24.9)         | 31 (25.2)         | 28 (40.0)          | 43 (51.2)          | <0.001 |

Abbreviations: IQR, interquartile range; PICU, pediatric intensive care unit; POPC, Pediatric Overall Performance Category; PRISM III-12, Pediatric Risk of Mortality III score from first 12 hours in the PICU.

<sup>a</sup> *P* values for comparison across groups were calculated using the chi-square test for trend or the non-parametric test for trend (Jonckheere-Terpstra test) for categorical and continuous variables, respectively.

<sup>b</sup> Disability was determined using the Pediatric Overall Performance Category. A score of 1 indicates a good functional status, while a score of 2 or greater represents at least mild disability.

<sup>c</sup> PRISM III-12 score utilizes physiologic and laboratory variables from the first 12 hours of PICU admission to calculate the overall risk of mortality. A higher score represents a higher risk of mortality.

<sup>d</sup> Other primary diagnoses include pulmonary edema or hemorrhage, pulmonary hypertension, laryngotracheobronchitis, thoracic trauma, pneumothorax, acute chest syndrome, pertussis, exacerbation of lung disease (cystic fibrosis or bronchopulmonary dysplasia), acute respiratory failure related to blood transfusions, acute respiratory failure after bone marrow transplantation, and other.

| <b>eTable 5. Patient, Family, and Hospitalization Characteristics Across Quartiles of Duration of Postdischarge Work Absence Category Among Secondary Caregivers (n = 614)</b> |                        |                        |                         |                        |                      |
|--------------------------------------------------------------------------------------------------------------------------------------------------------------------------------|------------------------|------------------------|-------------------------|------------------------|----------------------|
| No./total (%)                                                                                                                                                                  | No Absence (n = 421)   | Short Absence (n = 65) | Medium Absence (n = 70) | Long Absence (n = 58)  | P Value <sup>a</sup> |
| Duration of school absence, median (IQR), d                                                                                                                                    | 0 (0-0)                | 2 (1-2)                | 4.5 (4-5)               | 10 (10-40)             | <0.001               |
| Range                                                                                                                                                                          | 0-0                    | 1-2                    | 3-5                     | 6-208                  |                      |
| <b>Patient Characteristics</b>                                                                                                                                                 |                        |                        |                         |                        |                      |
| Age at PICU admission, median (IQR), y                                                                                                                                         | 1.8 (0.3-7.0)          | 1.4 (0.2-9.1)          | 2.0 (0.5-8.2)           | 3.2 (0.8-11.1)         | 0.15                 |
| Female                                                                                                                                                                         | 201 (47.7)             | 28 (43.1)              | 33 (47.1)               | 34 (58.6)              | 0.29                 |
| Non-Hispanic white,                                                                                                                                                            | 264 (62.7)             | 42 (64.6)              | 41 (58.6)               | 35 (60.3)              | 0.54                 |
| Functional impairment (POPC >1) at baseline <sup>b</sup>                                                                                                                       | 109 (25.9)             | 18 (27.7)              | 27 (38.6)               | 28 (48.3)              | <0.001               |
| <b>Pre-existing comorbidity</b>                                                                                                                                                |                        |                        |                         |                        |                      |
| Asthma                                                                                                                                                                         | 56 (13.3)              | 9 (13.9)               | 6 (8.6)                 | 4 (6.9)                | 0.11                 |
| Cancer                                                                                                                                                                         | 20 (4.8)               | 5 (7.7)                | 2 (2.9)                 | 8 (13.8)               | 0.051                |
| Chromosomal abnormality                                                                                                                                                        | 18 (4.3)               | 6 (9.2)                | 5 (7.1)                 | 5 (8.6)                | 0.08                 |
| Prematurity                                                                                                                                                                    | 57 (13.5)              | 8 (12.3)               | 8 (11.4)                | 8 (13.8)               | 0.82                 |
| Neurologic/neuromuscular disorder                                                                                                                                              | 37 (8.8)               | 5 (7.7)                | 7 (10.0)                | 5 (8.6)                | 0.93                 |
| Seizure disorder                                                                                                                                                               | 40 (9.5)               | 4 (6.2)                | 7 (10.0)                | 10 (17.2)              | 0.17                 |
| No known comorbidity                                                                                                                                                           | 247 (58.7)             | 36 (55.4)              | 43 (61.4)               | 30 (51.7)              | 0.53                 |
| <b>Family Characteristics</b>                                                                                                                                                  |                        |                        |                         |                        |                      |
| <b>Primary caregiver education</b>                                                                                                                                             |                        |                        |                         |                        |                      |
| Some high school                                                                                                                                                               | 27 (8.9)               | 3 (6.8)                | 2 (4.1)                 | 4 (9.8)                | 0.81                 |
| High school graduate                                                                                                                                                           | 65 (21.3)              | 9 (20.5)               | 6 (12.2)                | 9 (22.0)               |                      |
| Some college or technical school                                                                                                                                               | 92 (30.2)              | 13 (29.6)              | 24 (49.0)               | 12 (29.3)              |                      |
| College graduate/postgraduate                                                                                                                                                  | 121 (39.7)             | 19 (43.2)              | 17 (34.7)               | 16 (39.0)              |                      |
| Missing, No.                                                                                                                                                                   | 116                    | 21                     | 21                      | 17                     |                      |
| <b>Primary caregiver main daily activities</b>                                                                                                                                 |                        |                        |                         |                        |                      |
| Working full-time                                                                                                                                                              | 156 (37.1)             | 24 (36.9)              | 25 (35.7)               | 31 (53.5)              | 0.17                 |
| Working part-time                                                                                                                                                              | 172 (40.9)             | 29 (44.6)              | 26 (37.1)               | 17 (29.3)              |                      |
| Keeping house/raising children                                                                                                                                                 | 72 (17.1)              | 11 (16.9)              | 15 (21.4)               | 8 (13.8)               |                      |
| Other (student, retired, disabled)                                                                                                                                             | 21 (5.0)               | 1 (1.5)                | 4 (5.7)                 | 2 (3.5)                |                      |
| Median household income of zip code of residence, median (IQR)                                                                                                                 | 58,766 (45,381-76,011) | 58,218 (44,803-84,327) | 65,906 (49,016-85,170)  | 67,670 (49,509-86,699) | 0.05                 |
| <b>Income category of zip code of residence</b>                                                                                                                                |                        |                        |                         |                        |                      |
| <\$40,000                                                                                                                                                                      | 64 (15.2)              | 11 (16.9)              | 12 (17.1)               | 8 (13.8)               | 0.09                 |
| \$40,000 - \$79,999                                                                                                                                                            | 264 (62.7)             | 34 (52.3)              | 36 (51.4)               | 31 (53.5)              |                      |
| ≥\$80,000                                                                                                                                                                      | 93 (22.1)              | 20 (30.8)              | 22 (31.4)               | 19 (32.8)              |                      |
| <b>Hospitalization Characteristics</b>                                                                                                                                         |                        |                        |                         |                        |                      |
| PRISM III-12 score, median (IQR) <sup>c</sup>                                                                                                                                  | 7 (3-12)               | 8 (3-12)               | 6.5 (3-11)              | 7 (3-15)               | 0.99                 |
| <b>Primary diagnosis category</b>                                                                                                                                              |                        |                        |                         |                        |                      |
| Bronchiolitis or asthma                                                                                                                                                        | 152 (36.1)             | 25 (38.5)              | 17 (24.3)               | 14 (24.1)              | 0.03                 |
| Pneumonia or aspiration pneumonia                                                                                                                                              | 182 (43.2)             | 26 (40.0)              | 38 (54.3)               | 27 (46.6)              |                      |

|                                                              |                   |                    |                   |                    |        |
|--------------------------------------------------------------|-------------------|--------------------|-------------------|--------------------|--------|
| Acute respiratory failure related to sepsis                  | 49 (11.6)         | 7 (10.8)           | 9 (12.9)          | 10 (17.2)          |        |
| Other <sup>d</sup>                                           | 38 (9.0)          | 7 (10.8)           | 6 (8.6)           | 7 (12.1)           |        |
| Randomized to <i>RESTORE</i> sedation protocol               | 237 (56.3)        | 37 (56.9)          | 33 (47.1)         | 37 (63.8)          | 0.89   |
| PICU length of stay, median (IQR), d                         | 9.0<br>(6.0-14.5) | 10.1<br>(5.3-19.4) | 8.5<br>(6.3-19.3) | 14.4<br>(8.6-25.1) | 0.002  |
| Functional impairment (POPC >1) at discharge <sup>b</sup>    | 132 (31.4)        | 21 (32.3)          | 31 (44.3)         | 29 (50.0)          | <0.001 |
| <b>Post-hospitalization Outcomes</b>                         |                   |                    |                   |                    |        |
| Emergency department use in the 6 months following discharge | 136 (32.3)        | 23 (35.4)          | 37 (52.9)         | 33 (56.9)          | <0.001 |
| Hospital readmission in the 6 months following discharge     | 110 (26.1)        | 22 (33.9)          | 28 (40.0)         | 36 (62.1)          | <0.001 |

Abbreviations: IQR, interquartile range; PICU, pediatric intensive care unit; POPC, Pediatric Overall Performance Category; PRISM III-12, Pediatric Risk of Mortality III score from first 12 hours in the PICU.

<sup>a</sup> *P* values for comparisons across groups were calculated using the chi-square test for trend or the non-parametric test for trend (Jonckheere-Terpstra test) for categorical and continuous variables, respectively.

<sup>b</sup> Disability was determined using the Pediatric Overall Performance Category. A score of 1 indicates a good functional status, while a score of 2 or greater represents at least mild disability.

<sup>c</sup> PRISM III-12 score utilizes physiologic and laboratory variables from the first 12 hours of PICU admission to calculate the overall risk of mortality. A higher score represents a higher risk of mortality.

<sup>d</sup> Other primary diagnoses include pulmonary edema or hemorrhage, pulmonary hypertension, laryngotracheobronchitis, thoracic trauma, pneumothorax, acute chest syndrome, pertussis, exacerbation of lung disease (cystic fibrosis or bronchopulmonary dysplasia), acute respiratory failure related to blood transfusions, acute respiratory failure after bone marrow transplantation, and other.

| <b>eTable 6. Postdischarge School Absenteeism by Age Group</b>                                                                                                                                                                |                           |                           |                            |                            |                      |
|-------------------------------------------------------------------------------------------------------------------------------------------------------------------------------------------------------------------------------|---------------------------|---------------------------|----------------------------|----------------------------|----------------------|
| No./total (%)                                                                                                                                                                                                                 | Age 0-4<br>Years<br>n=152 | Age 5-9<br>Years<br>n=112 | Age 10-12<br>Years<br>n=58 | Age 13-18<br>Years<br>n=77 | P Value <sup>a</sup> |
| Any missed days after hospitalization                                                                                                                                                                                         | 83 (54.6%)                | 92 (82.1%)                | 45 (77.6%)                 | 59 (76.2%)                 | <0.001               |
| No. of missed days, median (IQR) <sup>a</sup>                                                                                                                                                                                 | 3.6 (0-14.6)              | 11.4 (2.3-42.0)           | 15.1 (1.3-57.9)            | 14.3 (1.6-36.4)            | <0.001               |
| Chronic absenteeism after hospitalization                                                                                                                                                                                     | 38 (25.0%)                | 49 (43.8%)                | 29 (50.0%)                 | 37 (48.1%)                 | <0.001               |
| <sup>a</sup> P values for comparison across groups were calculated using the chi-square test for trend or the non-parametric test for trend (Jonckheere-Terpstra test) for categorical and continuous variables, respectively |                           |                           |                            |                            |                      |

**eTable 7. Postdischarge Primary Caregiver Employment and Work Absenteeism by Age Group**

| No./total (%)                                      | Primary Caregivers of Children Age 0-4 Years<br>n=628 | Primary Caregivers of Children Age 5-9 Years<br>n=143 | Primary Caregivers of Children Age 10-12 Years<br>n=79 | A Primary Caregivers of Children Age 13-18 Years<br>n=110 | P Value <sup>a</sup> |
|----------------------------------------------------|-------------------------------------------------------|-------------------------------------------------------|--------------------------------------------------------|-----------------------------------------------------------|----------------------|
| Primary caregiver employed                         | 308 (63.4%)                                           | 82(62.9%)                                             | 49 (67.1%)                                             | 67 (66.4%)                                                | 0.003                |
| Any missed days after hospitalization <sup>b</sup> | 156 (50.7%)                                           | 52 (63.4%)                                            | 35 (71.4%)                                             | 59 (50.8%)                                                | 0.20                 |

<sup>a</sup> *P* values for comparison across groups were calculated using the chi-square test for trend or the non-parametric test for trend (Jonckheere-Terpstra test) for categorical and continuous variables, respectively. Comparison for age groups 0-4, 5-9, 10-12, 13-18 years.

<sup>b</sup> Total based on number of primary caregivers who reported employment

Additionally, there were 357 primary caregivers of children less the 1 year of age. Of these, 164 (45.9%) were employed outside of the home, among whom 76 missed work following their child’s discharge.
