# Supplementary material for: School and Work Absences After Critical Care Hospitalization for Pediatric Acute Respiratory Failure: A Secondary Analysis of a Cluster Randomized Trial
Source: PubMed Central journal article supplement (PMC8703244; doi:10.1001/jamanetworkopen.2021.40732), 2021-12-23
Supplement: jamanetwopen-e2140732-s002.pdf [file jamanetwopen-e2140732-s002.pdf]

\*Indicates required information. Only first name, last name, and suffix will appear in PubMed.

| <b>*Group Name(s): The RESTORE study investigators</b> |                   |                              |                  |                                                                                                                                                                                |                                          |                                                         |                                                                                            |
|--------------------------------------------------------|-------------------|------------------------------|------------------|--------------------------------------------------------------------------------------------------------------------------------------------------------------------------------|------------------------------------------|---------------------------------------------------------|--------------------------------------------------------------------------------------------|
| <b>*First Name and Middle Initial(s)</b>               | <b>*Last Name</b> | <b>*Suffix (eg, Jr, III)</b> | Academic Degrees | Institution                                                                                                                                                                    | Location (city, state/province, country) | Role or Contribution, eg, chair, principal investigator | Group (if more than 1 Group listed in the byline) and/or Subgroup (eg, Steering Committee) |
| Martha A.Q.                                            | Curley            |                              |                  | School of Nursing and the Perelman School of Medicine, University of Pennsylvania                                                                                              | Philadelphia, PA                         | Principal Investigator                                  |                                                                                            |
| David                                                  | Wypij             |                              |                  | Department of Biostatistics, Harvard T.H. Chan School of Public Health; Department of Pediatrics, Harvard Medical School; Department of Cardiology, Boston Children's Hospital | Boston, MA                               | Principal Investigator-Data Coordinating Center         |                                                                                            |
| Geoffrey L.                                            | Allen             |                              |                  | Children's Mercy Hospital                                                                                                                                                      | Kansas City, MO                          |                                                         |                                                                                            |
| Derek C.                                               | Angus             |                              |                  | Clinical Research, Investigation and Systems Modeling of Acute Illness Center                                                                                                  | Pittsburgh, PA                           |                                                         |                                                                                            |
| Lisa A.                                                | Asaro             |                              |                  | Department of Cardiology, Boston Children's Hospital                                                                                                                           | Boston, MA                               |                                                         |                                                                                            |
| Judy A.                                                | Ascenzi           |                              |                  | The Johns Hopkins Hospital                                                                                                                                                     | Baltimore, MD                            |                                                         |                                                                                            |
| Scot T.                                                | Bateman           |                              |                  | University of Massachusetts Memorial Children's Medical Center                                                                                                                 | Worcester, MA                            |                                                         |                                                                                            |
| Santiago                                               | Borasino          |                              |                  | Children's Hospital of Alabama                                                                                                                                                 | Birmingham, AL                           |                                                         |                                                                                            |
| Cindy                                                  | Darnell Bowens    |                              |                  | Children's Medical Center of Dallas                                                                                                                                            | Dallas, TX                               |                                                         |                                                                                            |
| G. Kris                                                | Bysani            |                              |                  | Medical City Children's Hospital                                                                                                                                               | Dallas, TX                               |                                                         |                                                                                            |
| Ira M.                                                 | Cheifetz          |                              |                  | Duke Children's Hospital                                                                                                                                                       | Durham, NC                               |                                                         |                                                                                            |
| Allison S.                                             | Cowl              |                              |                  | Connecticut Children's Medical Center                                                                                                                                          | Hartford, CT                             |                                                         |                                                                                            |
| Brenda L.                                              | Dodson            |                              |                  | Department of Pharmacy, Boston Children's Hospital                                                                                                                             | Boston, MA                               |                                                         |                                                                                            |
| E. Vincent S.                                          | Faustino          |                              |                  | Yale-New Haven Children's Hospital                                                                                                                                             | New Haven, CT                            |                                                         |                                                                                            |

## Supplemental Online Content: Nonauthor Collaborators

\*Indicates required information. Only first name, last name, and suffix will appear in PubMed.

| *First Name and Middle Initial(s) | *Last Name     | *Suffix (eg, Jr, III) | Academic Degrees | Institution                                                                            | Location (city, state/province, country) | Role or Contribution, eg, chair, principal investigator | Group (if more than 1 Group listed in the byline) and/or Subgroup (eg, Steering Committee) |
|-----------------------------------|----------------|-----------------------|------------------|----------------------------------------------------------------------------------------|------------------------------------------|---------------------------------------------------------|--------------------------------------------------------------------------------------------|
| Lori D.                           | Fineman        |                       |                  | University of California San Francisco<br>Benioff Children's Hospital At San Francisco | San Francisco, CA                        |                                                         |                                                                                            |
| Heidi R.                          | Flori          |                       |                  | University of California San Francisco<br>Benioff Children's Hospital At San Francisco | San Francisco, CA                        |                                                         |                                                                                            |
| Linda S.                          | Franck         |                       |                  | University of California San Francisco<br>School of Nursing                            | San Francisco, CA                        |                                                         |                                                                                            |
| Rainer G.                         | Gedeit         |                       |                  | Department of Pediatrics, Medical<br>College of Wisconsin                              | Milwaukee, WI                            |                                                         |                                                                                            |
| Mary Jo C.                        | Grant          |                       |                  | Primary Children's Hospital                                                            | Salt Lake Cit, UT                        |                                                         |                                                                                            |
| Andrea L.                         | Harabin        |                       |                  | National Heart, Lung, and Blood<br>Institute, National Institutes of<br>Health         | Bethesda, MD                             |                                                         |                                                                                            |
| Catherine                         | Haskins-Kiefer |                       |                  | Florida Hospital for Children                                                          | Orlando, FL                              |                                                         |                                                                                            |
| James H.                          | Hertzog        |                       |                  | Neumours/Alfred I. duPont Hospital<br>for Children                                     | Wilmington, DE                           |                                                         |                                                                                            |
| Larissa                           | Hutchins       |                       |                  | The Children's Hospital of<br>Philadelphia                                             | Philadelphia, PA                         |                                                         |                                                                                            |
| Aileen L.                         | Kirby          |                       |                  | Oregon Health and Science<br>University Doernbecher Children's<br>Hospital             | Portland, OR                             |                                                         |                                                                                            |
| Ruth M.                           | Lebet          |                       |                  | School of Nursing, University of<br>Pennsylvania                                       | Philadelphia, PA                         |                                                         |                                                                                            |
| Michael A.                        | Matthay        |                       |                  | University of California at San<br>Francisco School of Medicine                        | San Francisco, CA                        |                                                         |                                                                                            |
| Gwenn E.                          | McLaughlin     |                       |                  | Holtz Children's Hospital, Jackson<br>Health System                                    | Miami, FL                                |                                                         |                                                                                            |
| JoAnne E.                         | Natale         |                       |                  | University of California Davis<br>Children's Hospital                                  | Sacramento, CA                           |                                                         |                                                                                            |
| Phineas P.                        | Oren           |                       |                  | St. Louis Children's Hospital                                                          | St. Louis, MO                            |                                                         |                                                                                            |

Supplemental Online Content: Nonauthor Collaborators

\*Indicates required information. Only first name, last name, and suffix will appear in PubMed.

| *First Name and Middle Initial(s) | *Last Name    | *Suffix (eg, Jr, III) | Academic Degrees | Institution                                                                               | Location (city, state/province, country) | Role or Contribution, eg, chair, principal investigator | Group (if more than 1 Group listed in the byline) and/or Subgroup (eg, Steering Committee) |
|-----------------------------------|---------------|-----------------------|------------------|-------------------------------------------------------------------------------------------|------------------------------------------|---------------------------------------------------------|--------------------------------------------------------------------------------------------|
| Nagendra                          | Polavarapu    |                       |                  | Advocate Children's Hospital-Oak Lawn                                                     | Oak Lawn, IL                             |                                                         |                                                                                            |
| James B.                          | Schneider     |                       |                  | Cohen Children's Medicine Center of New York                                              | Hyde Park, NY                            |                                                         |                                                                                            |
| Adam J.                           | Schwarz       |                       |                  | Children's Hospital of Orange County                                                      | Orange, CA                               |                                                         |                                                                                            |
| Thomas P.                         | Shanley       |                       |                  | C.S. Mott Children's Hospital at the University of Michigan                               | Ann Arbor, MI                            |                                                         |                                                                                            |
| Shari                             | Simone        |                       |                  | University of Maryland Medical Center                                                     | Baltimore, MD                            |                                                         |                                                                                            |
| Lewis P.                          | Singer        |                       |                  | The Children's Hospital at Montefiore                                                     | Bronx, NY                                |                                                         |                                                                                            |
| Lauren R.                         | Sorce         |                       |                  | Ann & Robert H. Lurie Children's Hospital of Chicago                                      | Chicago, IL                              |                                                         |                                                                                            |
| Edward J.                         | Truemper      |                       |                  | Children's Hospital and Medical Center                                                    | Omaha, NE                                |                                                         |                                                                                            |
| Michele A.                        | Vander Heyden |                       |                  | Children's Hospital at Dartmouth                                                          | Dartmouth, NH                            |                                                         |                                                                                            |
| R. Scott                          | Watson        |                       |                  | Center for Child, Health, Behavior and Development, Seattle Children's Research Institute | Seattle, WA                              |                                                         |                                                                                            |
| Claire R.                         | Wells         |                       |                  | University of Arizona Medical Center                                                      | Tucson, AZ                               |                                                         |                                                                                            |
